# Supplementary material for: Liposomal Formulations of a Polyleucine–Antigen Conjugate as Therapeutic Vaccines against Cervical Cancer
Source: MDPI journal article supplement (doi:10.3390/pharmaceutics15020602), 2023-02-10
Supplement: s1 [file s1]

## Supporting Information

### **Liposomal formulations of a polyleucine-antigen conjugate as therapeutic vaccines against cervical cancer.**

Farrhana Z. Firdaus<sup>a</sup>, Stacey Bartlett<sup>a</sup>, Waleed M. Hussein<sup>a</sup>, Lantian Lu<sup>a</sup>, Quentin Wright<sup>b</sup>, Wenbin Huang<sup>a</sup>, Ummey J. Nahar<sup>a</sup>, Jieru Yang<sup>a</sup>, Mattaka Khongkow<sup>a,c</sup>, Margaret Veitch<sup>b</sup>, Prashamsa Koirala<sup>a</sup>, Uracha R. Ruktanonchai<sup>c</sup>, Michael J. Monteiro<sup>d</sup>, Jazmina G. Cruz<sup>b</sup>, Rachel J. Stephenson<sup>a</sup>, James W. Wells<sup>b</sup>, Istvan Toth<sup>a,e,\*</sup>, Mariusz Skwarczynski<sup>a,\*</sup>

<sup>1</sup> *The University of Queensland, School of Chemistry and Molecular Biosciences, St Lucia QLD 4072, Australia*

<sup>2</sup> *The University of Queensland Diamantina Institute, The University of Queensland, Translational Research Institute, Brisbane, Australia.*

<sup>3</sup> *National Nanotechnology Center (NANOTEC), National Science and Technology Development Agency, 111 Thailand Science Park, Phahonyothin Rd., Khlong Luang, Pathumthani 12120, Thailand.*

<sup>4</sup> *Australian Institute for Bioengineering and Nanotechnology, The University of Queensland, Brisbane, QLD 4072, Australia*

<sup>5</sup> *The University of Queensland, School of Pharmacy, Woolloongabba, QLD 4102, Australia*

<sup>6</sup> *The University of Queensland, Institute for Molecular Biosciences, St Lucia, QLD 4072, Australia*

Corresponding Author:

Istvan Toth [i.toth@uq.edu.au](mailto:i.toth@uq.edu.au)

Mariusz Skwarczynski [m.skwarczynski@uq.edu.au](mailto:m.skwarczynski@uq.edu.au)

A)

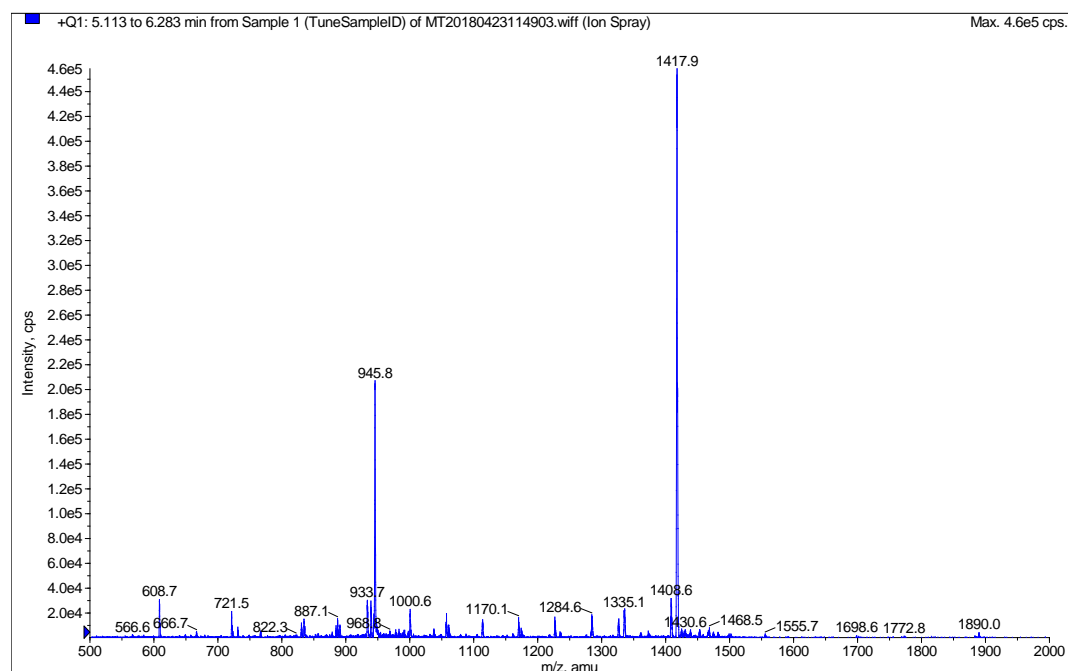

B)

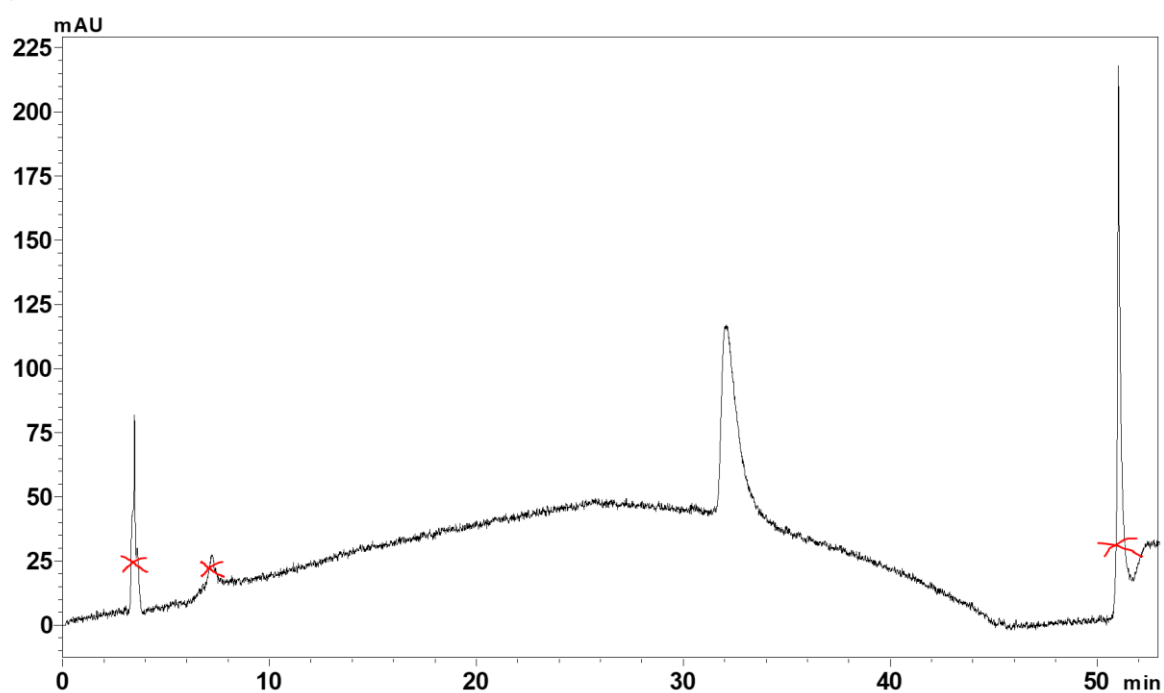

**Figure S1.** (A) ESI-MS:  $m/z$  1417.7 (calculated 1417.2)  $[M+2H]^{2+}$ ; 945.7 (calculated 945.2)  $[M+3H]^{3+}$ ; MW = 2832.5; and (B) HPLC trace of **pLeu-8Qm**.  $t_R$  = 32 min.

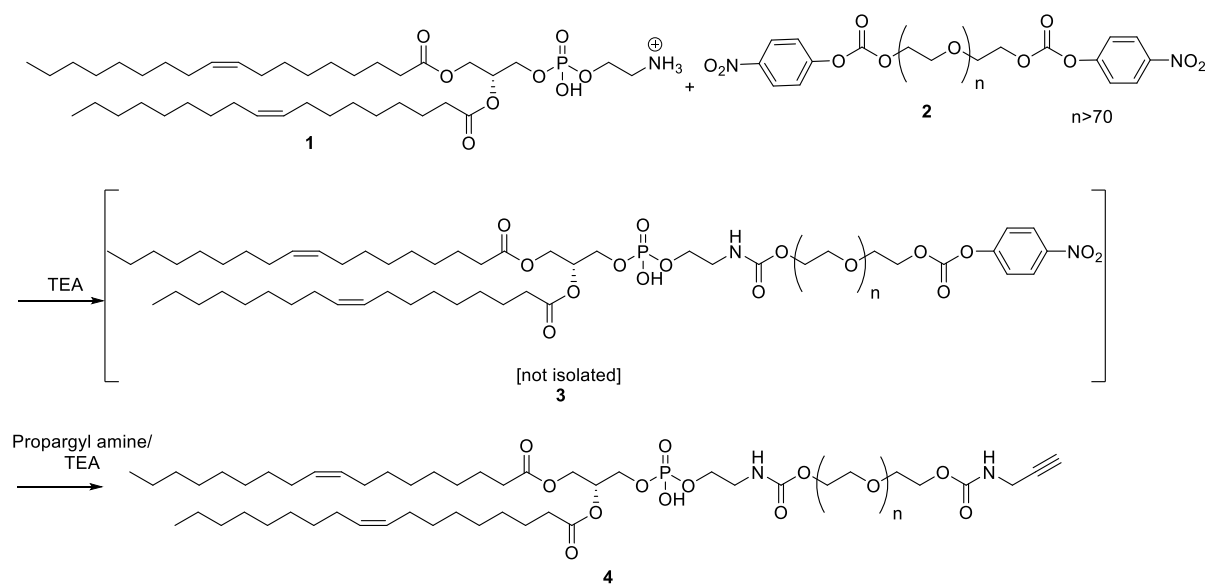

**Figure S2.** Synthesis of compound DOPE-PEG3.4k-alkyne (**4**) as per published procedure.<sup>1</sup>

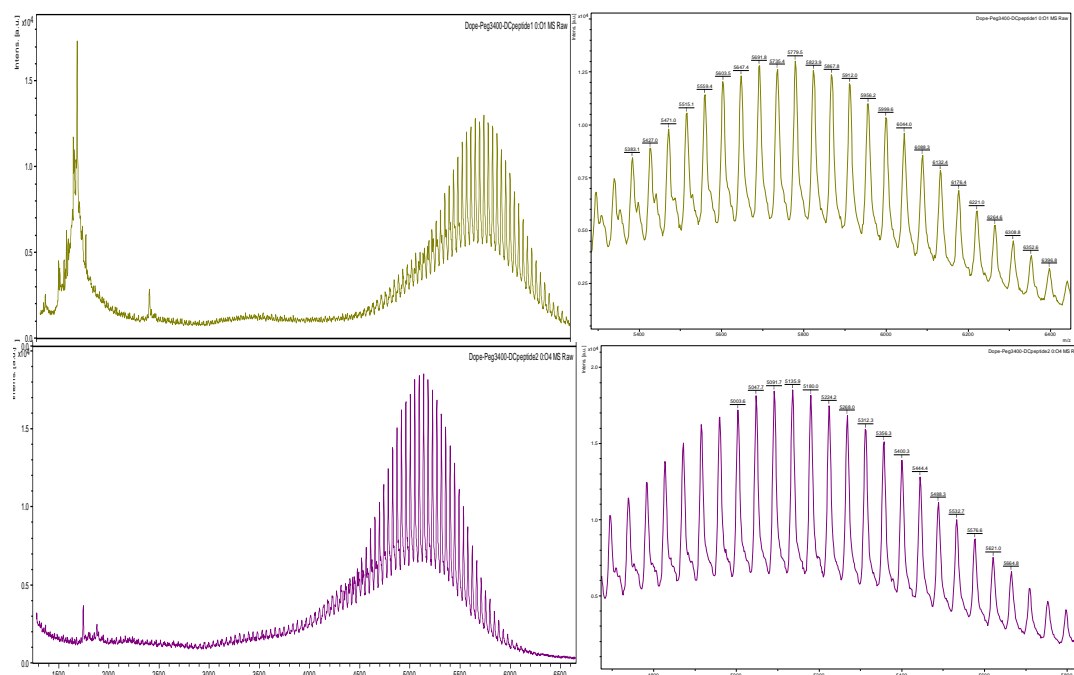

**Figure S3.** The MALDI-TOF mass spectrometry of **DC1** (upper panel) and **DC2** (lower panel).

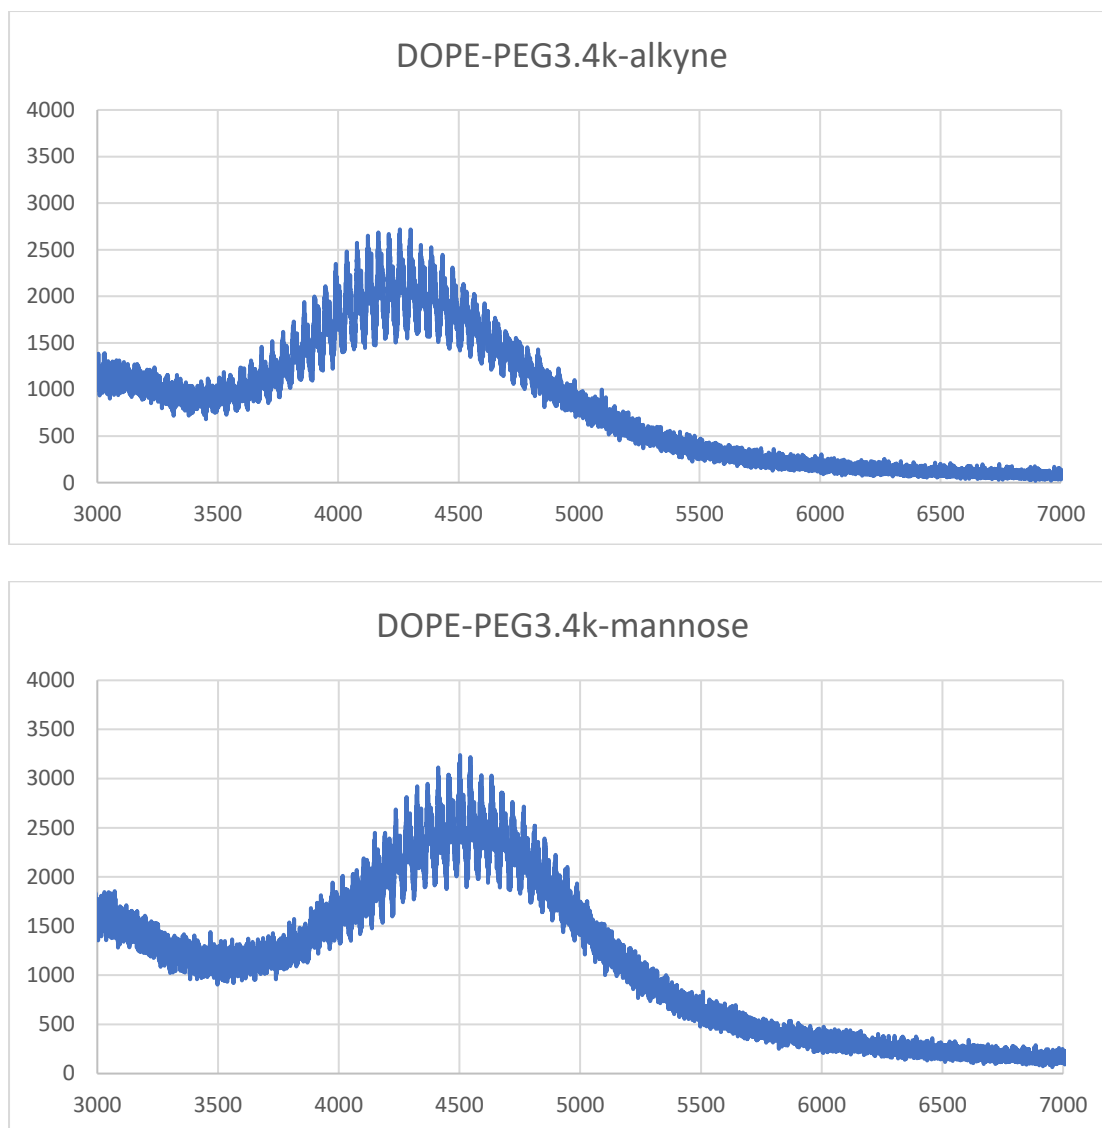

**Figure S4.** The MALDI-TOF mass spectrometry of Top = DOPE-PEG3.4k-alkyne (**4**), Bottom = DOPE-PEG3400-mannose (**M1**)

A)

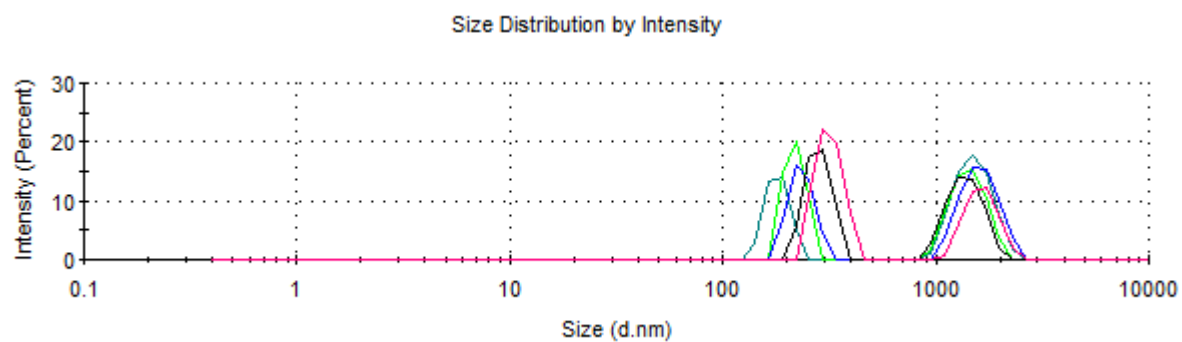

B)

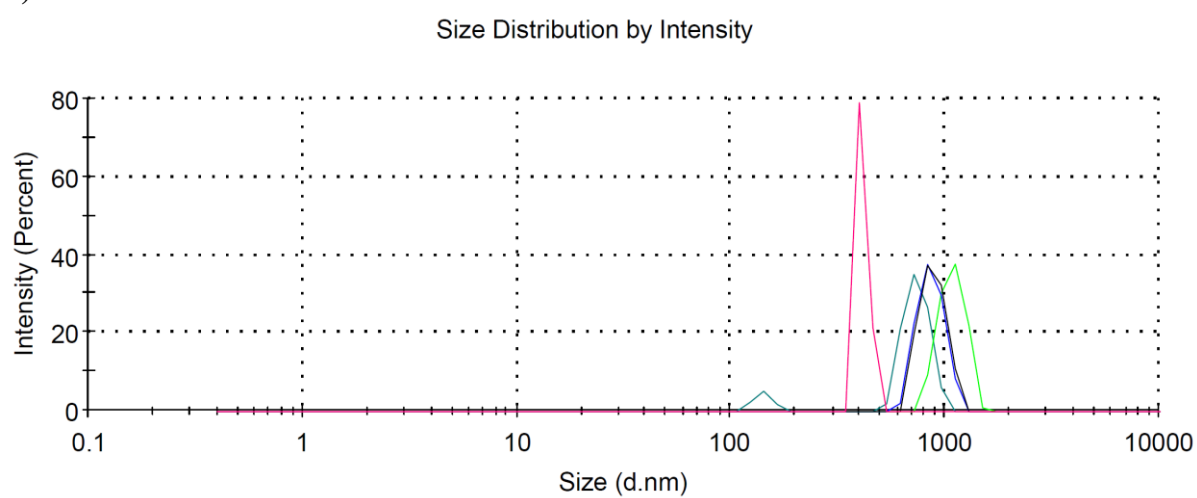

C)

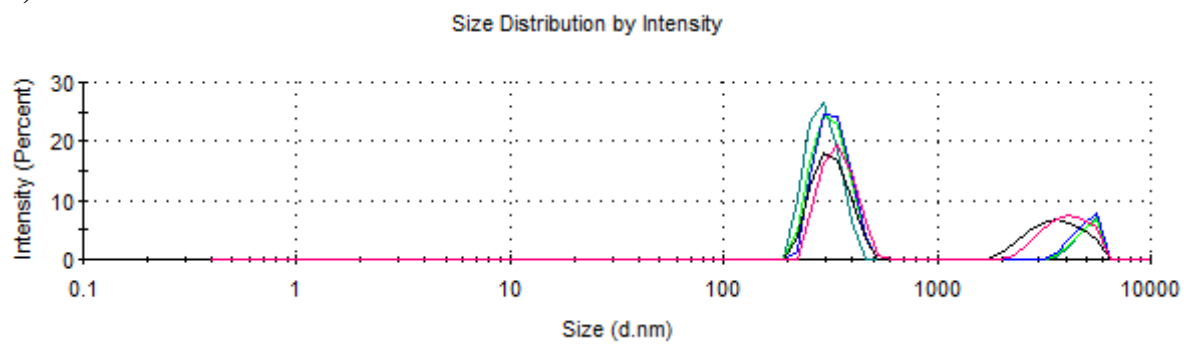

D)

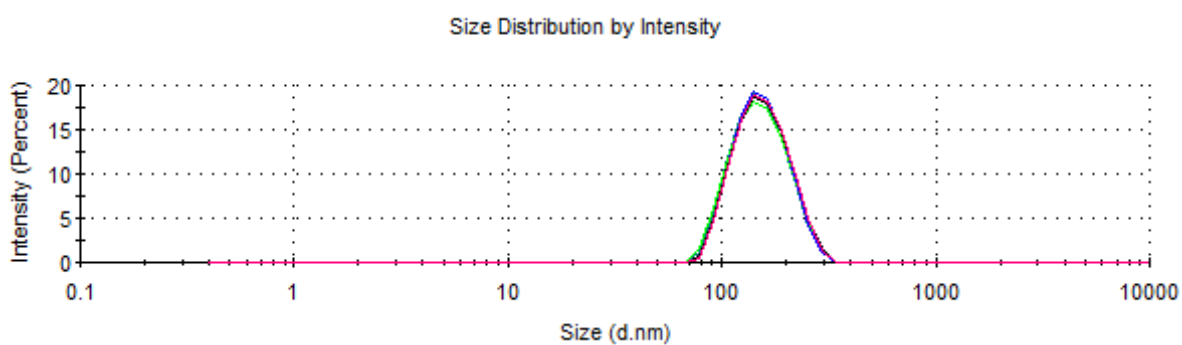

E)

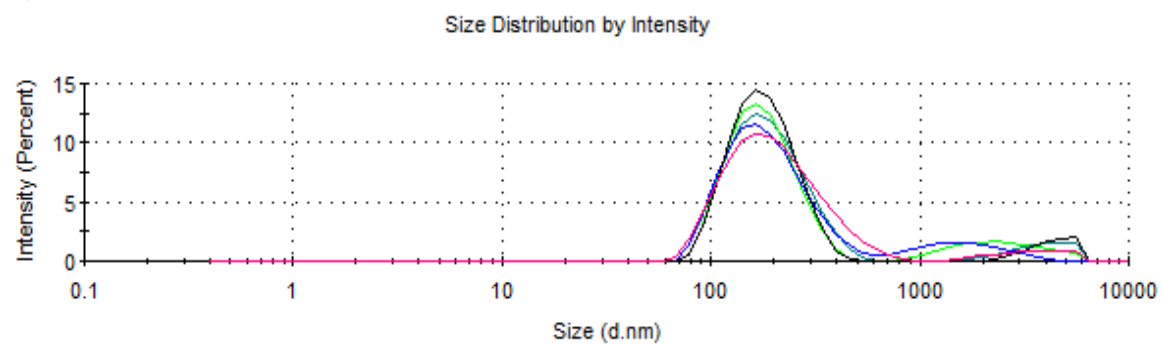

F)

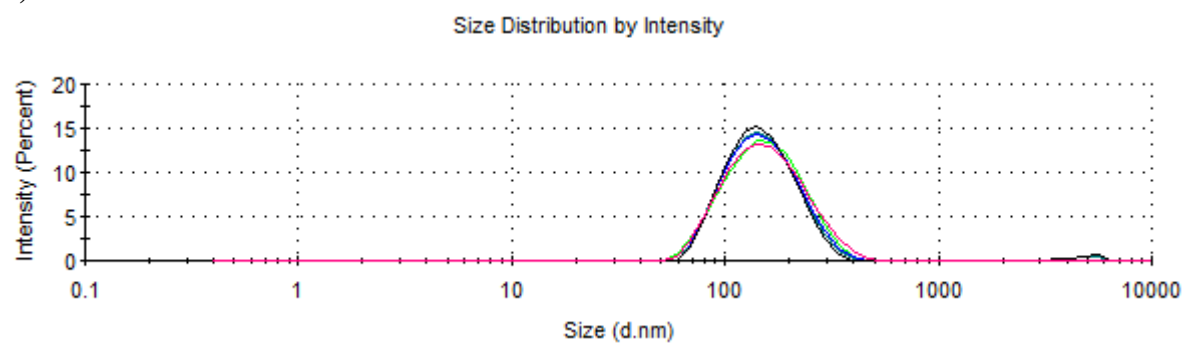

G)

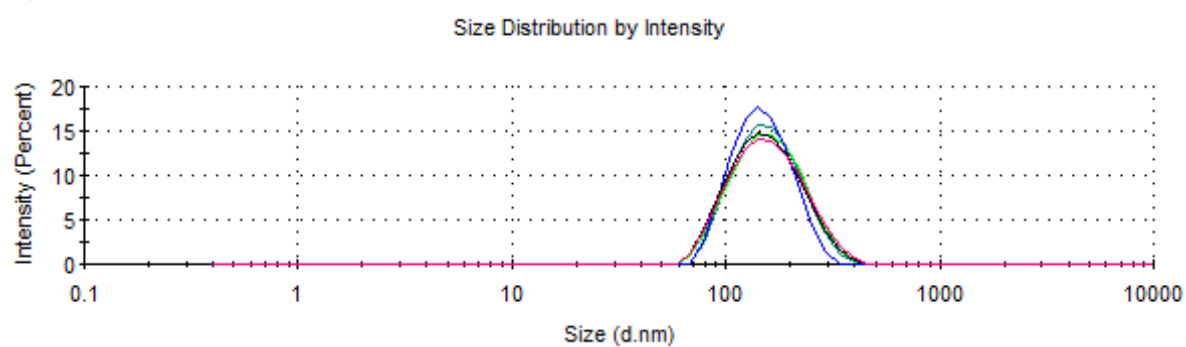

H)

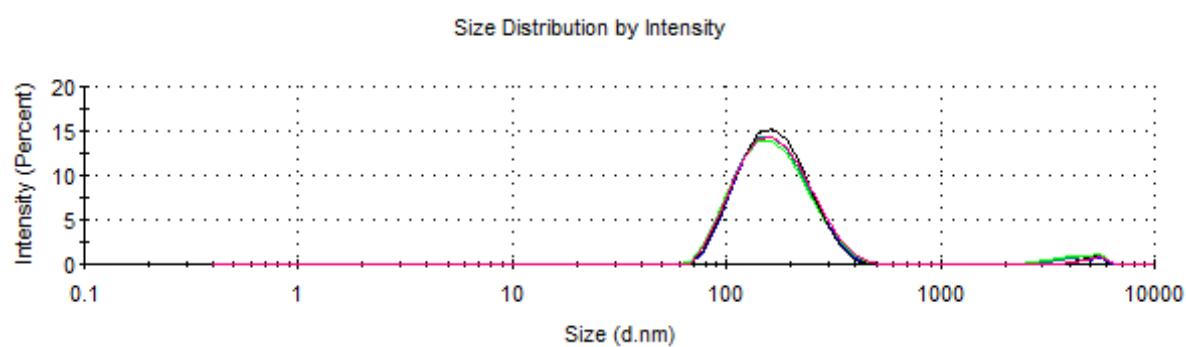

**I)**

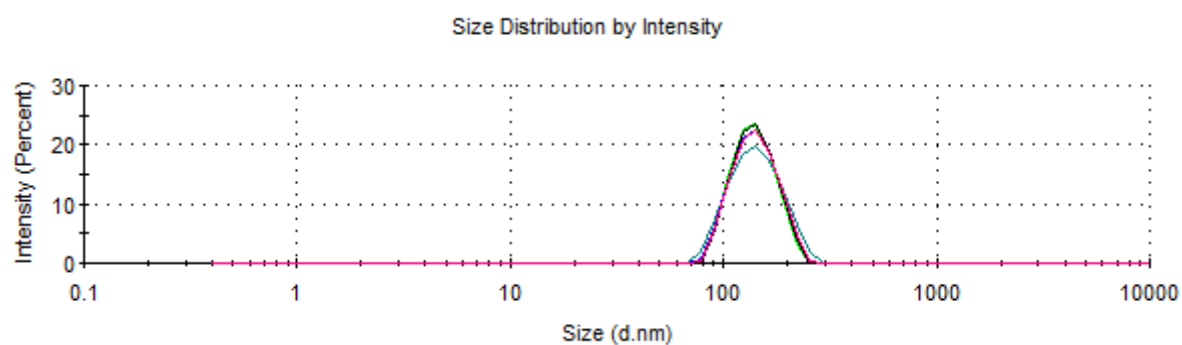

**J)**

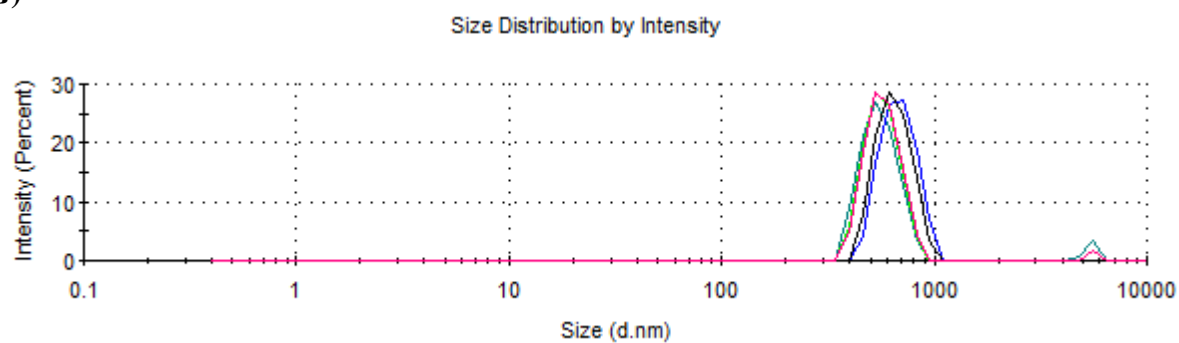

**Figure S5.** Particles size of A) **D-8Qm**, B) **pLeu-8Qm**, C) **L1**, D) **L2**, E) **L2DC1**, F) **L2DC2**, G) **L2M1**, H) **L2M2**, I) **L2M3**, and J) **L2CPP**. Five independent measurements per compound were recorded by dynamic light scattering (DLS).



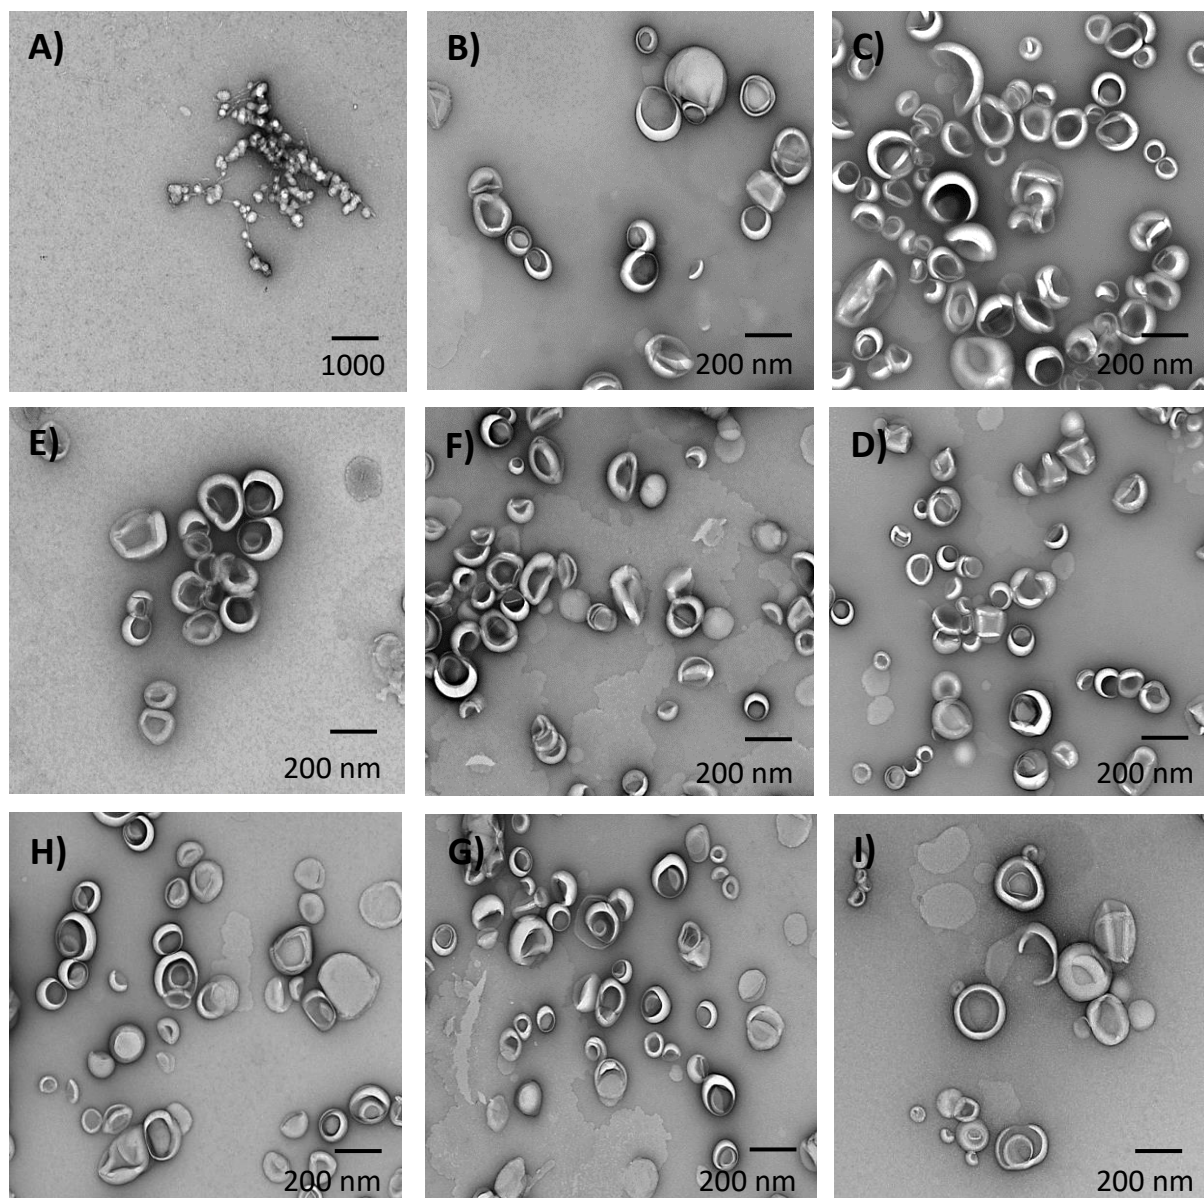

**Figure S6.** Transmission electron microscopy images of A) **D-8Qm**, B) **L1**, C) **L2**, D) **L2DC1**, E) **L2DC2**, F) **L2M1**, G) **L2M2**, H) **L2M3**, and I) **L2CPP** stained with 2% uranyl acetate (bar = 200 and 1000 nm).

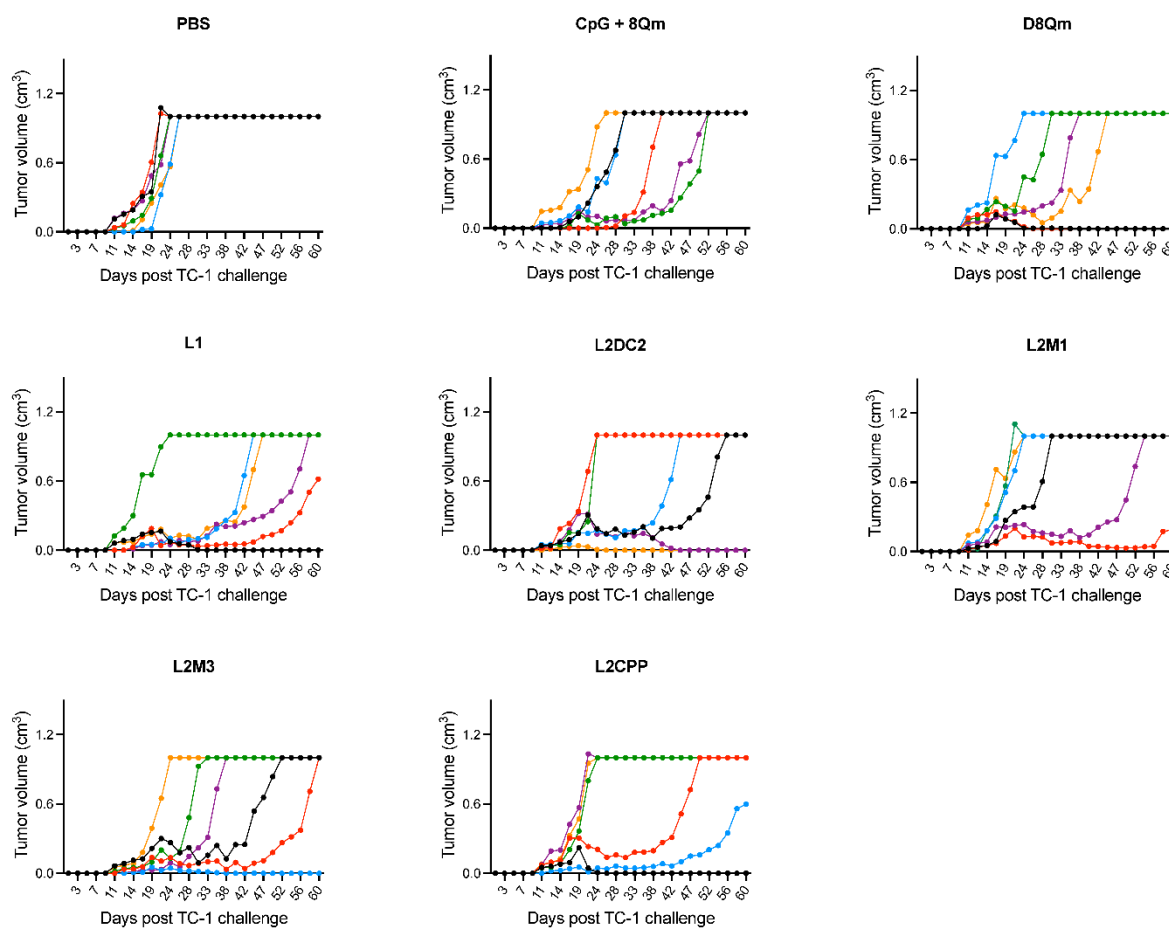

**Figure S7.** *In vivo* tumour treatment experiments. C57BL/6 mice (n = 8 mice/group) were inoculated subcutaneously with TC-1 tumour cells (day 0) and vaccinated with different immunogens on day 11. Tumour volume was monitored and plotted for each individual mouse immunised with **PBS**, **CpG + 8Qm**, **D8Qm**, **L1**, **L2DC2**, **L2M1**, **L2M3**, and **L2CPP**.

## References

1. Hussein, W. M.; Cheong, Y. S.; Liu, C.; Liu, G.; Begum, A. A.; Attallah, M. A.; Moyle, P. M.; Torchilin, V.; Smith, R.; Toth, I. Peptide-based targeted polymeric nanoparticles for siRNA delivery. *Nanotechnology* **2019**, 30.
